# Supplementary material for: Tumor signal amplification and immune decoy strategy using bacterial membrane-coated nanoparticles for immunotherapy
Source: Royal Society of Chemistry journal article supplement (doi:10.1039/d4bm01535e), 2025-01-01
Supplement: d4bm01535e1.pdf [file d4bm01535e1.pdf]

# **Tumor Signal Amplification and Immune Decoy Strategy Using Bacterial Membrane-Coated Nanoparticles for Immunotherapy**

*Yifan Li<sup>1#</sup>, Weiwei Wang<sup>1#</sup>, Jiale Xu<sup>1#</sup>, Bei Zhao<sup>2</sup>, Longying Xiong<sup>2</sup>, Dan Ge<sup>2</sup>, Yanping  
Wu<sup>2</sup>, Xiaotan Dou<sup>2</sup>, Yuping Fu<sup>3</sup>, Lei Wang<sup>\*2</sup>, Cheng Zhao<sup>\*2</sup>, Min Chen<sup>\*1,2</sup>*

<sup>1</sup>Department of Gastroenterology, Nanjing Drum Tower Hospital Clinical College  
of Nanjing University of Chinese Medicine, Nanjing, 210008, China

<sup>2</sup>Department of Gastroenterology, Nanjing Drum Tower Hospital, The Affiliated  
Hospital of Medical School, Nanjing University, Nanjing, 210008, China

<sup>3</sup> Department of Pharmacy, Zhangjiajie People's Hospital, Hunan, 427099, China

| Abbreviation | Full name                                      |
|--------------|------------------------------------------------|
| PF           | PEG-PCL-5-Fu                                   |
| PFS          | PEG-PCL-5-Fu-SPIO                              |
| PFE          | PEG-PCL-5-Fu@ Escherichia coli membrane        |
| PFSE         | PEG-PCL-5-Fu-SPIO@Escherichia coli<br>membrane |

Table S1 A full name for different nanomedicine groups

| Abbreviation | Full name                               |
|--------------|-----------------------------------------|
| PP           | PEG-PCL                                 |
| PPS          | PEG-PCL-SPIO                            |
| PPE          | PEG-PCL@ Escherichia coli membrane      |
| PPSE         | PEG-PCL-SPIO@ Escherichia coli membrane |

Table S2 The full name of different nano material groups

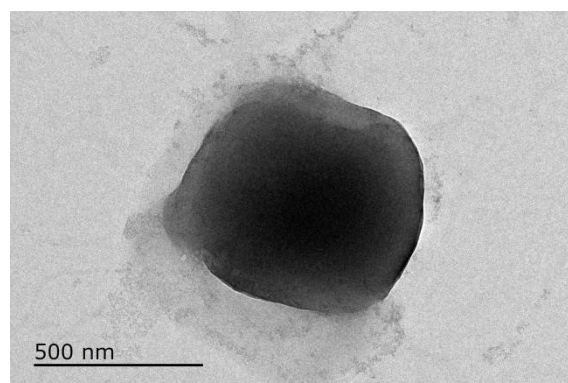

**Figure S1.** TEM images of EcM. The scale bar is 500 nm.

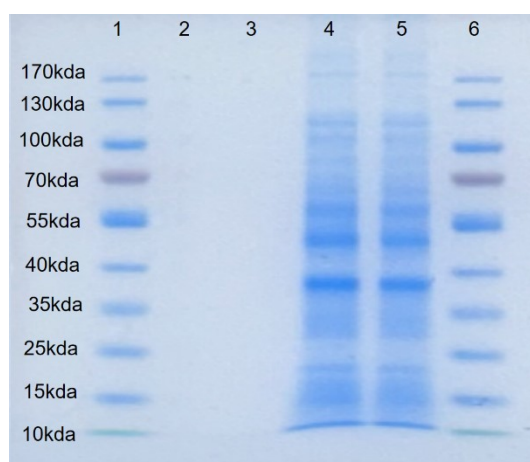

**Figure S2.** Coomassie Brilliant Blue staining of PF, PFS, EcM, and PFSE samples. Lane: 1 - marker, 2 - PF, 3 - PFS, 4 -EcM, 5 - PFSE, 6 - marker. Distinct bands indicate the presence of EcM.

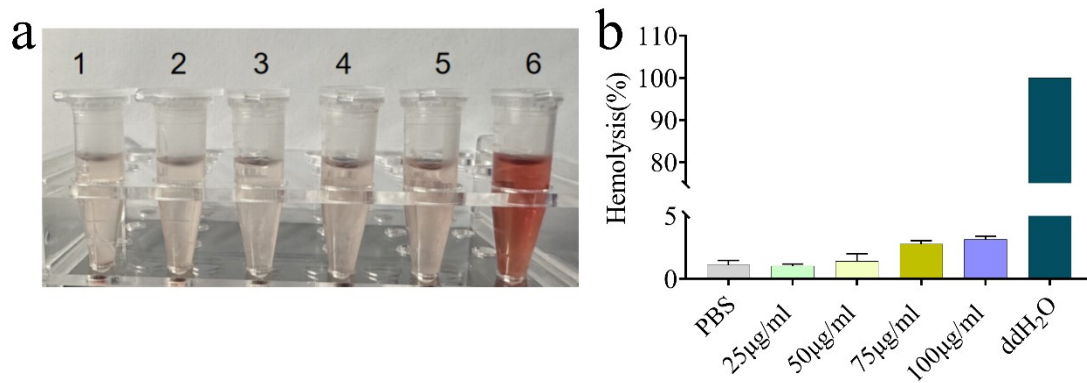

**Figure S3.** Hemolytic assay of PFSE. (a) The corresponding supernatant samples (1 - PBS, 2 - PFSE (25μg/ml), 3 - PFSE (50 μg/ml), 4 - PFSE (75 μg/ml), 5 - PFSE (100 μg/ml), 6 - ddH<sub>2</sub>O). (b) Quantitative analysis of the hemolysis assay at an absorbance of PFSE.

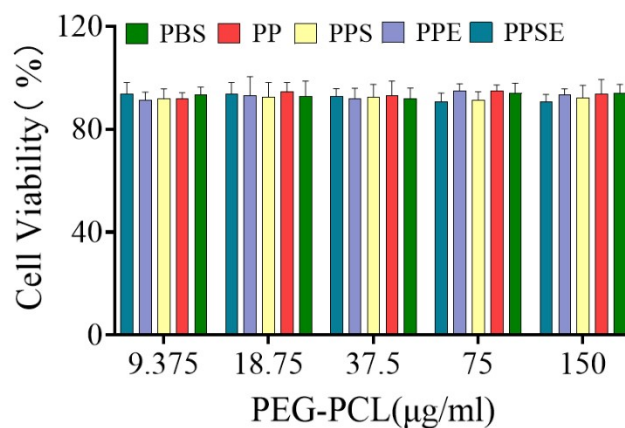

**Figure S4.** Focuses on the effects of PEG-PCL carrier concentration on 3T3 cell survival to explore its biosafety. The cell viability of 3T3 cells after incubation with PBS, PP, PPS, PPE and PPSE containing PEG-PCL at different concentrations for 24 h.

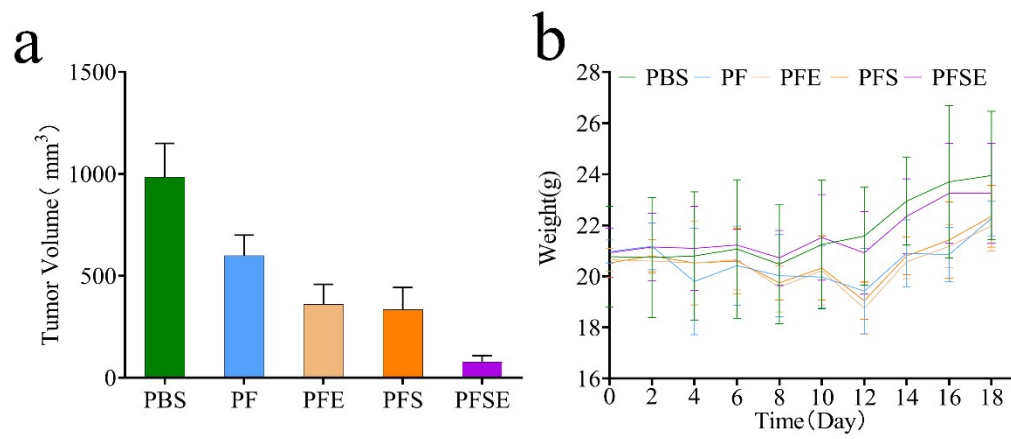

**Figure S5.** (a) Mean tumor volume in the PBS, PF, PFE, PFS, and PFSE groups. (b) Changes in body weight over the treatment period.

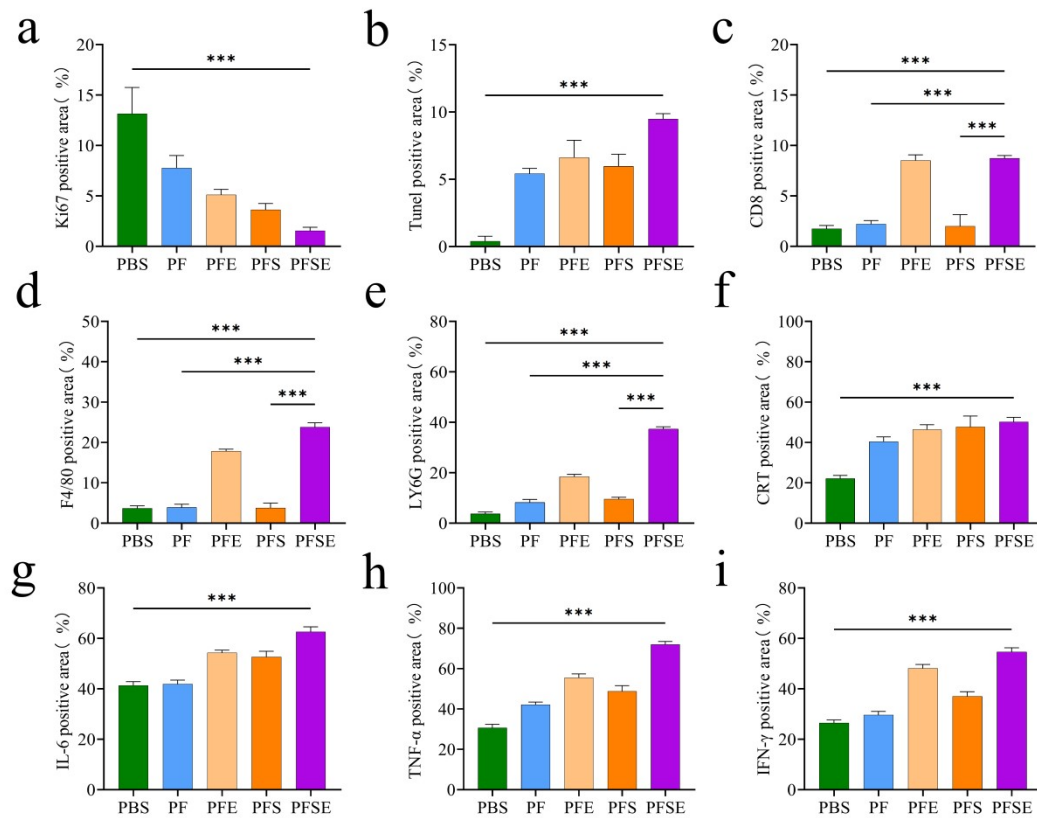

**Figure S6.** Fluorescence semi-quantitative of immunohistochemical staining images in the different groups.

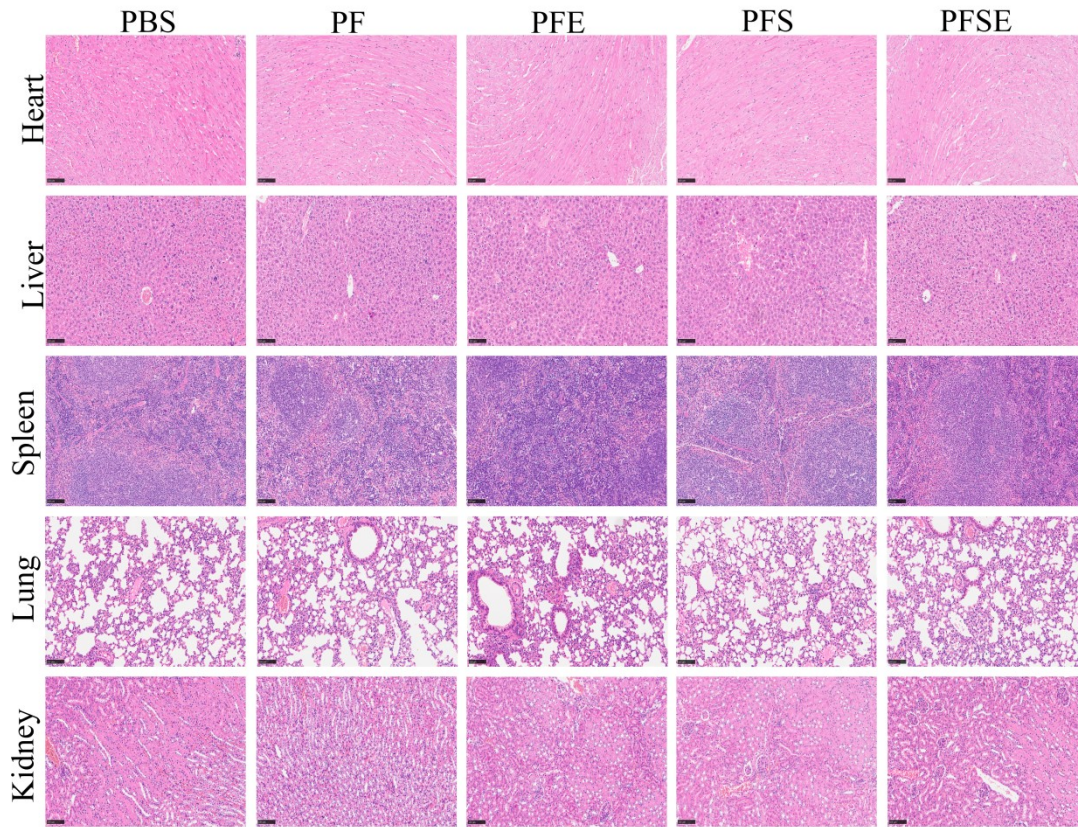

**Figure S7.** *In vivo* biocompatibility evaluation. HE staining images of major organs excised on day 18 post-treatment. The scale bars are 100  $\mu$ m.

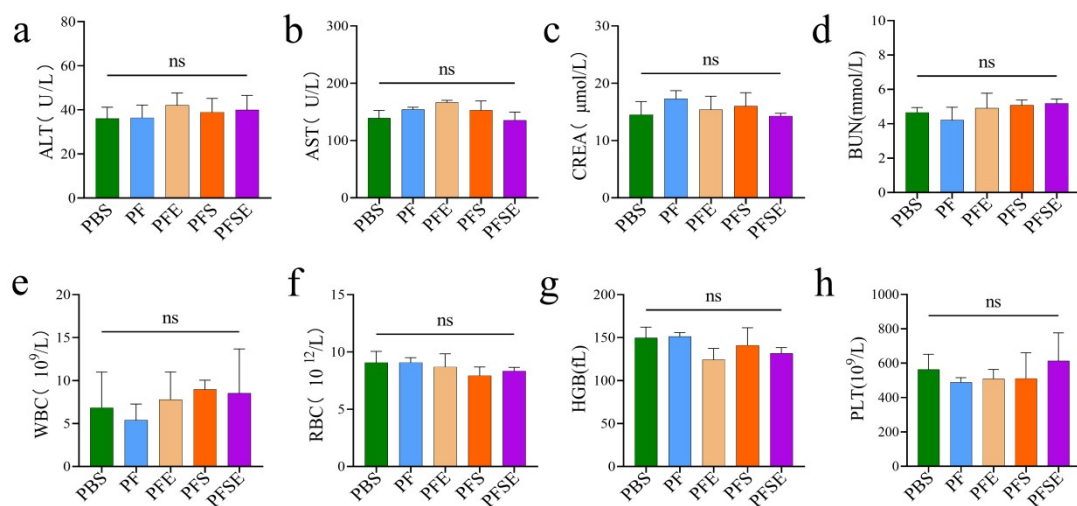

**Figure S8.** Biochemical and blood routine indices across different treatment groups. (a) Alanine Aminotransferase (ALT). (b) Aspartate Aminotransferase (AST). (c) Creatinine (CREA). (d) Blood Urea Nitrogen (BUN). (e) White Blood Cell (WBC)



count. (f) Red Blood Cell (RBC) count. (g) Hemoglobin (HGB). (h) Platelet (PLT) count.

Western blot image

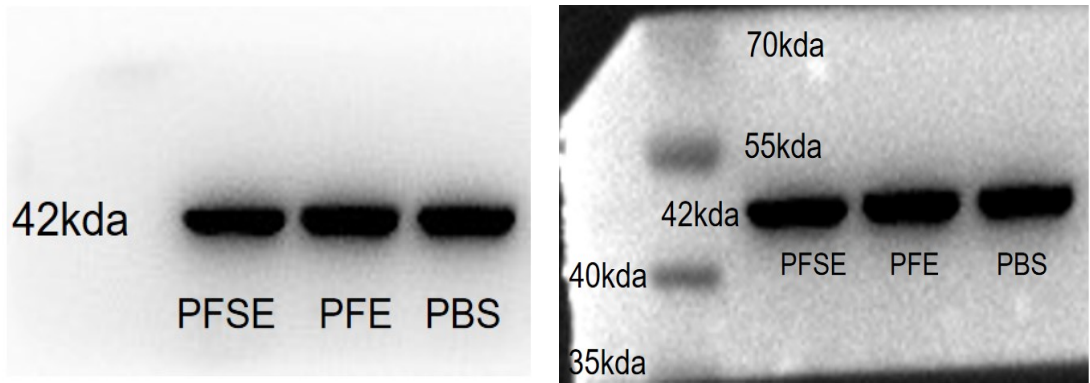

Image of actin

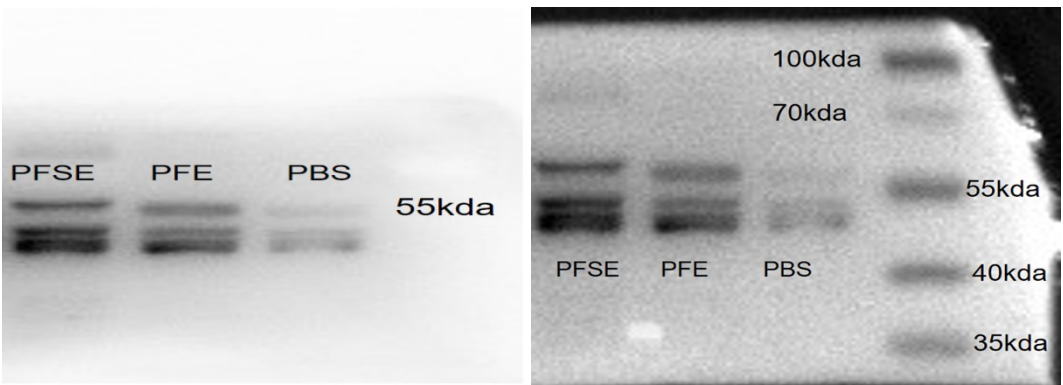

Image of calreticulin
